# Supplementary material
Source: PubMed Central journal article supplement (PMC3536078)
Supplement: AEM.02290-12_zam999103981so1.pdf [file AEM.02290-12_zam999103981so1.pdf]

## Table S1. Primers used in this study

### Primers used for lambda Red-mediated mutant construction<sup>a</sup>:

|                                |                                                                                       |
|--------------------------------|---------------------------------------------------------------------------------------|
| pduD+P1_F                      | 5'AAATTAATGAAAAATTGCTGCGCCAGATAATTGAAGACGTACTCCGCGA<br><u>TTGTAGGCTGGAGCTGCTTCG3'</u> |
| pduD+P2_R                      | 5'CTGCGGGTTTTTGCCCGTCACGACGTACTTGGTCTCTTTAATATGCAAAA<br><u>CATATGAATATCCTCCTTAG3'</u> |
| eutK+P1_F                      | 5'ATGCGATAGCGACTACTGCGTTTACGCAACGCTCCGTCAGAAAAGAGTT<br><u>GTGTAGGCTGGAGCTGCTTCG3'</u> |
| eutK+P2_R                      | 5'CAATGCCCTGGGATTACTGGAAGTGGACGGAATGGTCGCCGCCGTCGAT<br><u>GCATATGAATATCCTCCTTAG3'</u> |
| cobS+P1_F                      | 5'GCCAGCAGAAAGATCAATTCACCAAGTTCGATCGCCGCGCCAGCGTAT<br><u>CTGTAGGCTGGAGCTGCTTCG3'</u>  |
| cobS+P2_R                      | 5'ATGAGTAAGCTGTTTTGGGCCATGCTCGCTTTTATTAGCCGCTTGCCCGTC<br><u>ATATGAATATCCTCCTTAG3'</u> |
| pduA-X+P1_F                    | 5'ATGCAACAAGAAGCACTAGGAATGGTAGAAACCAAAGGCTTAACCGCAG<br><u>CGTGTAGGCTGGAGCTGCTTC3'</u> |
| pduA-X+P2_R                    | 5'TCACTGCAGTTTGACCCCGCCAGTGACCATCTTGAGTAAATGTTGTTTTG<br><u>ATGGGAATTAGCCATGGTCC3'</u> |
| eutK-S+P1_F                    | 5'ATGAATAAAGAACGCATTATTCAGGAATTTGTGCCGGGCAAACAGGTCA<br><u>CGTGTAGGCTGGAGCTGCTTC3'</u> |
| eutK-S+P2_R                    | 5'TTAATTTTTGATGCGATAGCGACTACTGCGTTTACGCAACGCTCCGTCAG<br><u>ATGGGAATTAGCCATGGTCC3'</u> |
| pduA-X/eutKS+P1_F <sup>b</sup> | 5'ATGAATAAAGAACGCATTATTCAGGAATTTGTGCCGGGCAAACAGGTCA<br><u>CGTGTAGGCTGGAGCTGCTTC3'</u> |
| pduA-X/eutKS+P2_R <sup>b</sup> | 5'TTAATTTTTGATGCGATAGCGACTACTGCGTTTACGCAACGCTCCGTCAG<br><u>ATGGGAATTAGCCATGGTCC3'</u> |

<sup>a</sup> Sequences complementary to pKD3/pKD4 are underlined.

<sup>b</sup> Primer pair to generate a double *pduA-X* and *eutKS* deletion mutant in the *pduA-X*-minus mutant background by replacement of *eutKS* with the *cat* gene.

### Primers used for gene cloning and mutant complementation<sup>c</sup>:

|               |                                           |
|---------------|-------------------------------------------|
| XbaI+pduDX_F  | 5'CCCCCTAGAAAAGCCAAGCTAACCGGCGACTATTTG3'  |
| SacI+pduDX_R  | 5'CCCCGAGCTCTGAAACACGCCGATGTAAAAGCCGAAT3' |
| EcoRI+eutRK_F | 5'CCCCGAATCAACCAACTATTCGGCCGCGTTCTTAAC3'  |
| SacI+eutRK_R  | 5'CCCCGAGCTCTACCAACCACAGACAGCAGCGAATC3'   |
| EcoRI+cobTS_F | 5'CCCCGAATCCATTTTCGTGATATTGCCGGTCGGGTC3'  |
| SacI+cobTS_R  | 5'CCCCGAGCTCCGCATTATATCCCTTCCTTTGTCGC3'   |

<sup>c</sup> Italicized letters represent a string of four Cs followed by restriction enzyme target sequences

### Primers used for qRT-PCR:

|        |                              |
|--------|------------------------------|
| cbiE_F | 5'CCGTCGGGATAAAGG3'          |
| cbiE_R | 5'TGGTTCGCTAACTGCTC3'        |
| cobS_F | 5'CTACGCCCGTGAAGAGG3'        |
| cobS_R | 5'AACAGAGCCAGCAGAAAAGAT3'    |
| eutD_F | 5'CGCCGGACGCAGTGGAAAAG3'     |
| eutD_R | 5'CTGCGGCAGCATCAGGAAAATAGA3' |

|        |                              |
|--------|------------------------------|
| eutM_F | 5'TTGAGGCCTCCGATGCGATGGTAA3' |
| eutM_R | 5'CGCCTTTGAAGCTGATCGGGAACA3' |
| fruK_F | 5'CGTGTTGCCACCATT3'          |
| fruK_R | 5'CTGAACCACCTGAAAGC3'        |
| fucI_F | 5'GACGATACCTCCATTCT3'        |
| fucI_R | 5'GGTTCTGGGCTTCATT3'         |
| gyrB_F | 5'CGCCGATAACTCCGTGTCCGTAAC3' |
| gyrB_R | 5'CGACAGAGCGTTGACTACCGAGAC3' |
| pduE_F | 5'ACGCCCTTCGTCCGTATCGTT3'    |
| pduE_R | 5'TTAATCGTCGCCTTTGAGTTTTT3'  |
| pduM_F | 5'GCAGCGCATTGTCGAGGAGATTGT3' |
| pduM_R | 5'CCGAACCCGCATGCAGAACCAG3'   |
| rhaA_F | 5'CCGCAGTAGGTATTGATGT3'      |
| rhaA_R | 5'AGGTAAATGGCGTGTAGG3'       |
| ttrC_F | 5'TACCGTCGCCCTGTCA3'         |
| ttrC_R | 5'AGGTGCCGAGAATAGCC3'        |
